# Supplementary material for: Prediction equation to estimate heart rate at individual ventilatory threshold in female and male obese adults
Source: PLoS One. 2018 May 11;13(5):e0197255. doi: 10.1371/journal.pone.0197255 (PMC5947910; doi:10.1371/journal.pone.0197255)
Supplement: S1 File — HRrest = heart rate at rest, 6-MWTHR = average heart rate during six minute walking test; HRIVT = heart rate at IVT; Gender: 0 = females, 1 = males. (XLSX) [file pone.0197255.s001.xlsx]

## Sheet: Foglio1
Gender	HRrest	6-MWTHR	HRIVT
1	78	126	130
0	86	159	157
0	66	126	127
0	76	138	118
1	77	106	102
0	89	142	137
1	82	151	136
1	61	122	118
1	66	127	105
0	71	151	138
0	79	149	138
1	94	146	143
0	50	130	98
0	59	111	95.5
0	80	131	128
0	71	129	124
1	72	107	106
1	61	122	104
0	69	148	147
1	70	138	123
1	77	138	94
1	63	122	109
0	71	120	121
0	61	127	99
0	87	178	154
1	62	94	88.5
0	90	157	144
0	108	135	138
0	86	160	128
0	58	103	108
0	77	161	137
0	58	137	126
0	70	132	130
0	71	117	123
0	75	165	144
0	76	137	124
0	60	112	120.5
0	80	169	147
0	90	137	138
1	107	167	142.5
1	60	147	106.5
0	62	103	100
0	79	148	133
0	79	143	144
1	92	158	145
0	65	130	116
0	65	122	123
1	75	117	104.5
0	67	127	113
0	82	146	145
0	67	111	98
0	76	156	157
1	84	129	123
1	79	148	144
0	65	129	112
1	69	143	132
0	65	123	125
1	63	131	113
0	80	123	126
0	78	147	137
0	71	138	134
0	68	121	122
1	80	130	131
1	70	125	115
0	84	92	121
0	83	127	116
0	85	164	159.5
0	85	164	159.5
0	63	112	98
0	92	142	138
0	59	128	101
0	91	116	109
0	80	151	146.5
0	97	161	130.5
0	75	130	121.5
1	72	132	112
1	70	125	114.5
0	73	137	127
0	70	136	116
1	87	159	124
1	74	116	105
0	78	119	135
0	63	142	102
1	77	153	118
0	93	140	132
0	88	146	136
0	66	136	116
0	67	142	115.5
1	66	138	122
0	65	116	92
1	90	151	145
0	75	123	112
0	77	131	119
0	80	133	151.5
0	68	120	110.5
0	56	128	101
1	64	135	95
1	56	108	91
0	83	133	120
0	73	118	114
0	72	131	134
0	93	146	134
0	74	146	117.5
0	80	153	146.5
0	91	168	164
0	81	145	124
0	70	137	118
0	72	119	110
0	61	115	104
1	77	141	124
0	89	167	155
0	59	100	96
1	80	98	84.5
1	82	117	105
0	63	127	129.5
0	64	100	108.5
0	67	136	124
1	89	126	115
0	61	90	93
1	93	152	141
0	96	139	130
0	63	117	130
0	72	120	104.5
1	64	100	87.5
0	58	107	96
1	57	146	128
0	75	142	118
0	74	84	112
0	67	115	124
0	64	95	94
1	63	99	96
0	69	122	102
0	72	117	101.5
0	60	140	116
1	72	150	141
0	65	136	110
1	77	146	134
0	61	93	84
0	73	130	98
1	61	118	118
0	77	126	114
0	66	116	116
0	78	122	126.5
0	80	176	160
0	69	111	99
0	78	88	111
1	93	131	129.5
0	94	133	124
0	78	121	114
0	81	140	131
0	94	132	134.5
0	80	114	111.5
0	77	133	111.5
0	81	109	98.5
0	68	92	84
0	71	110	90
0	83	109	111
1	80	126	118
1	68	117	129
0	80	120	112
0	61	108	90
